# Supplementary material for: CO catalytic oxidation by a metal organic framework containing high density of reactive copper sites
Source: Royal Society of Chemistry journal article supplement (doi:10.1039/c1cc00001b), 2011-01-01
Supplement: c1cc00001b.pdf [file c1cc00001b.pdf]

## **CO Catalytic Oxidation by Metal Organic Framework Containing High Density of Reactive Copper Sites**

**Yonggang Zhao,<sup>a,#</sup> Moothetty Padmanabhan,<sup>a,#</sup> Qihan Gong,<sup>a</sup> Nobuko Tsumori,<sup>b,\*</sup>  
Qiang Xu,<sup>c</sup> and Jing Li<sup>a,\*</sup>**

<sup>a</sup> *Department of Chemistry and Chemical Biology, Rutgers University, 610 Taylor Road,  
Piscataway, New Jersey, 08854, USA*

<sup>b</sup> *Toyama National College of Technology, 13, Hongo-machi, Toyama, 939-8630, JAPAN*

<sup>c</sup> *National Institute of Advanced Industrial Science and Technology (AIST), Ikeda,  
Osaka, 563-8577, JAPAN*

### **Supporting Information**

## Experimental Section

**Materials:** All chemicals were purchased from commercial sources (Alfa Aesar, Acros, Aldrich or TCI America) and used as received.

Compound **1**: **1** was prepared by a hydrothermal method.  $\text{Cu}(\text{CH}_3\text{COO})_2 \cdot \text{H}_2\text{O}$  (0.199g, 1.0 mmol) and *nip* (0.213g, 1.0 mmol) were dissolved in 10mL of water. The mixture was first stirred for 15 mins to form a blue gel, then sealed in a Parr reaction vessel and heated at 373 K for 2 days. After naturally cooling down to room temperature, very uniform blue crystalline powder (diameter around 50 $\mu\text{m}$ ) of **1** (0.080g, 88% yield based on metal) was isolated by filtration. The product was washed with water and DMF orderly, and then dried under vacuum.

**PXRD Analysis:** Powder X-ray diffraction experiments were conducted using a D/M-2200T automated system (Ultima<sup>+</sup>, Rigaku) with Cu K $\alpha$  radiation ( $\lambda=1.5406 \text{ \AA}$ ). The PXRD patterns were collected between  $2\theta$  angles of 3° to 50° at a scan rate of 5 deg·min<sup>-1</sup>. Graphite monochromator was used and the generator power settings were at 40 kV and 40 mA.

**Thermogravimetric Analysis:** The thermal properties of the compound were evaluated using a TA Instruments Q50 TG unit. The samples (~10 mg) were loaded onto a sample pan and heated from room temperature to 600 °C at a rate of 10 °C·min<sup>-1</sup> under N<sub>2</sub> (flow and purge rate at 40 mL·min<sup>-1</sup> and 60 mL·min<sup>-1</sup>, respectively).

**Catalysis Experiment:** The catalytic oxidation of CO was conducted by using a fixed bed plug flow reactor system. Pure CO, O<sub>2</sub> and He were supplied through mass flow controllers and mixed with each other, and then the final reactant gas (37 ml min<sup>-1</sup>) was passed through the catalyst bed. The catalyst (0.11 g) was mixed with quartz sand

(>300  $\mu\text{m}$ , 0.22 g) and filled in the reactor made of stainless steel and then calcinated in argon at 120°C for 3 h and in the reaction gas at 250 °C for 1 h. The reaction gas was composed from CO (1 vol. %), O<sub>2</sub> (20 vol. %) and He (balance), and hourly space velocity (SV) was 20,000 mL·h<sup>-1</sup>·g(cat.)<sup>-1</sup>. The reaction temperature was programmed between room temperature and 250°C and monitored by thermocouple.

The reactant CO and product CO<sub>2</sub> were analyzed by using an on-line gas chromatograph (GC) system, which was composed of two gas chromatographs; one (GC-8A, Shimadzu) with Molecular Sieve 5A (3 m) for CO and one (GC-2014, Shimadzu) with Porapack Q (4 m) for CO<sub>2</sub>, respectively. The retention times of gases were checked by comparison with those of authentic samples. Conversions of CO to CO<sub>2</sub> were calculated from the data ( $X_{\text{CO}}$ ) from the GC for CO according to

$$X_{\text{CO}} = (1 - A_{\text{CO}} / A_{\text{CO}^*}) \times 100 (\%)$$

where  $A_{\text{CO}^*}$  and  $A_{\text{CO}}$  are the peak areas of CO before and after the reaction, respectively. Conversions of CO to CO<sub>2</sub> were calculated from the data from the GC ( $X_{\text{CO}_2}$ ) for CO<sub>2</sub> according to

$$X_{\text{CO}_2} = A_{\text{CO}_2} / A_{\text{CO}_2^*} \times 100 (\%)$$

where  $A_{\text{CO}_2^*}$  is the peak area of CO<sub>2</sub> after the complete conversion of CO to CO<sub>2</sub> and  $A_{\text{CO}_2}$  is the peak area of CO<sub>2</sub> after the reaction. The values of  $X_{\text{CO}_2}$  and  $X_{\text{CO}}$  are almost in agreement with each other.

Reaction rate (R, mol of CO<sub>2</sub> (mol of Cu . s)<sup>-1</sup>) was calculated as follows:

$$R_{\text{GC}} = X_{\text{GC}} \times F_{\text{CO}} / M_{\text{Cu}}$$

$F_{\text{CO}}$  ( $\text{mol s}^{-1}$ ) is flow rate of CO in reactant gas, and  $M_{\text{Cu}}$  is the amount of Cu (mol) in used catalyst (0.11g) calculated from the formula weight of proposed dehydrated form  $[\text{Cu}_5(\text{OH})_2(\text{nip})_4]$ .

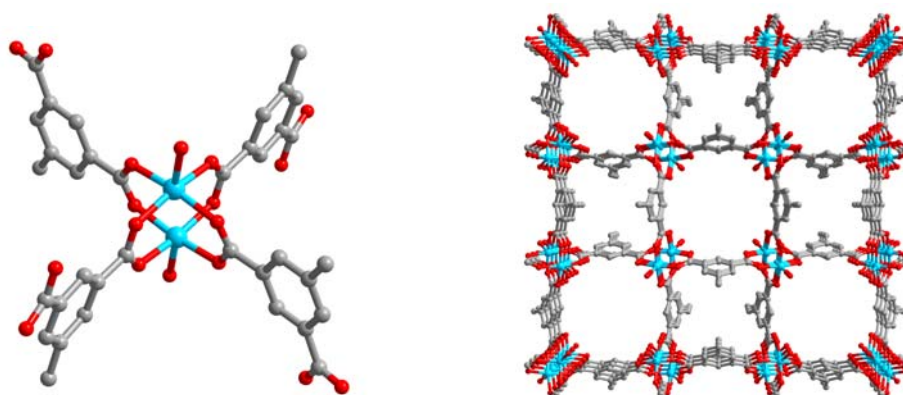

**Fig S1.** Paddle-wheel  $\text{Cu}_2$  building unit and perspective view of the microporous framework of  $\text{Cu}(\text{mip})(\text{H}_2\text{O})$ .

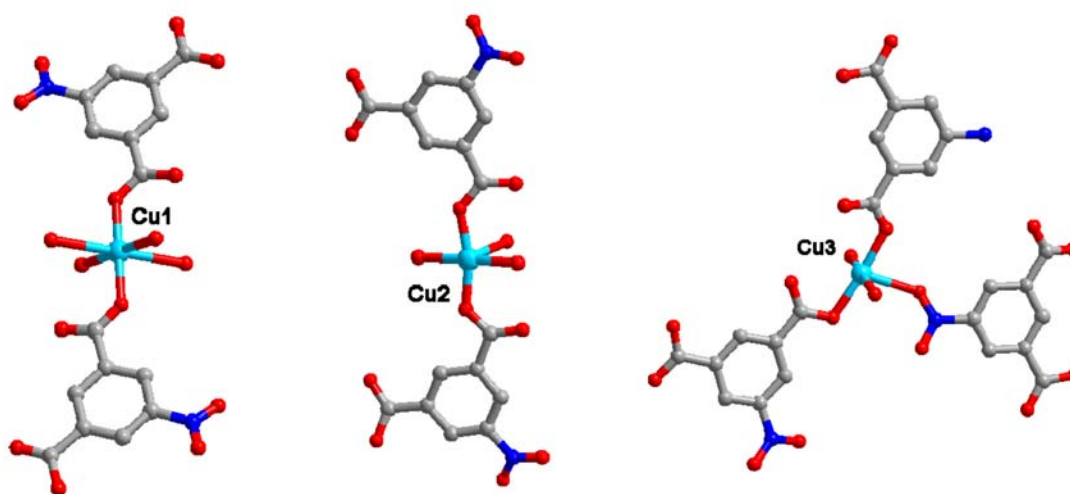

**Fig S2.** Coordination environment of crystallographically independent copper centers in the pentameric  $\text{Cu}_5$  building unit.

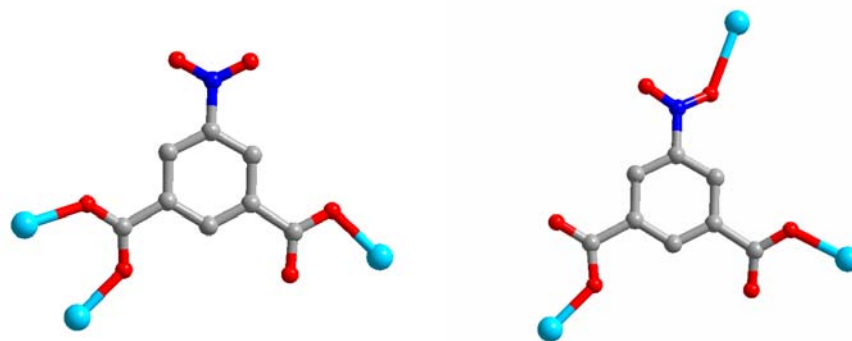

**Fig S3.** Two coordinated modes of the *nip* ligand.

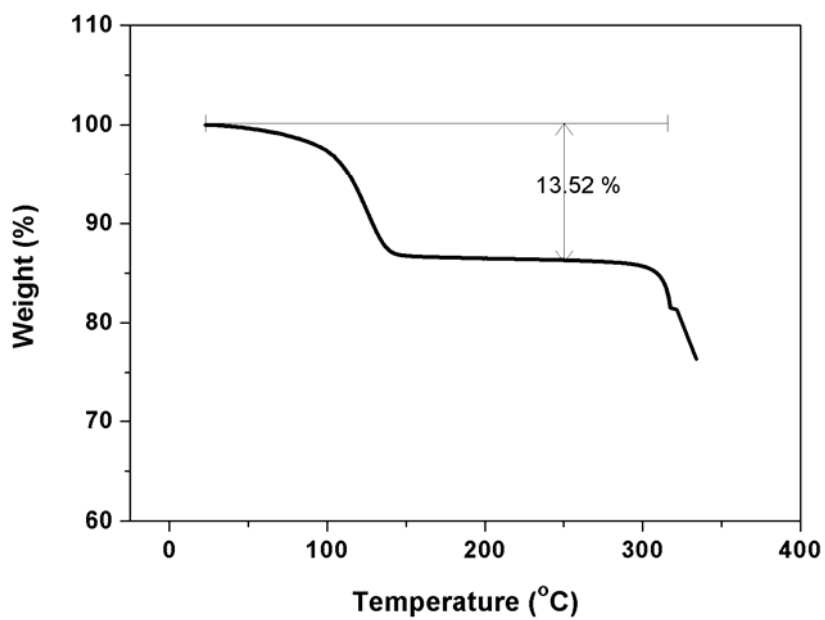

**Fig. S4.** Thermogravimetric (TG) profile of compound **1**.

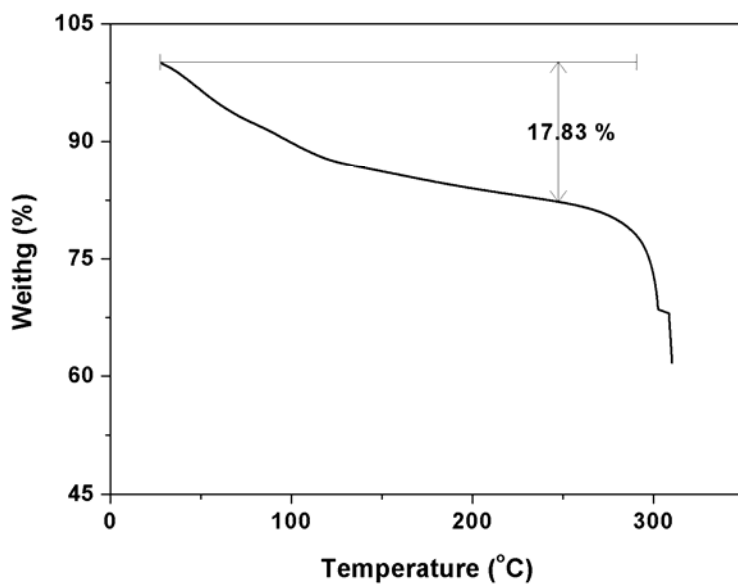

**Fig. S5.** TG profile of compound **1'** after the adsorption of  $\text{NH}_3$ .

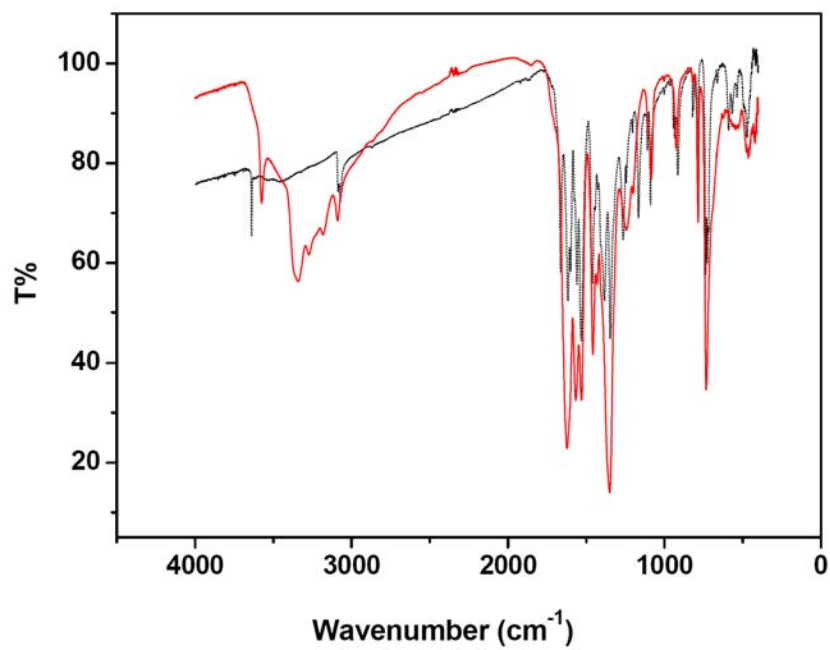

**Fig. S6.** FT-IR spectra of the compound **1'** (black dot) and **1'** after exposure to vapor of ammonia (red solid).

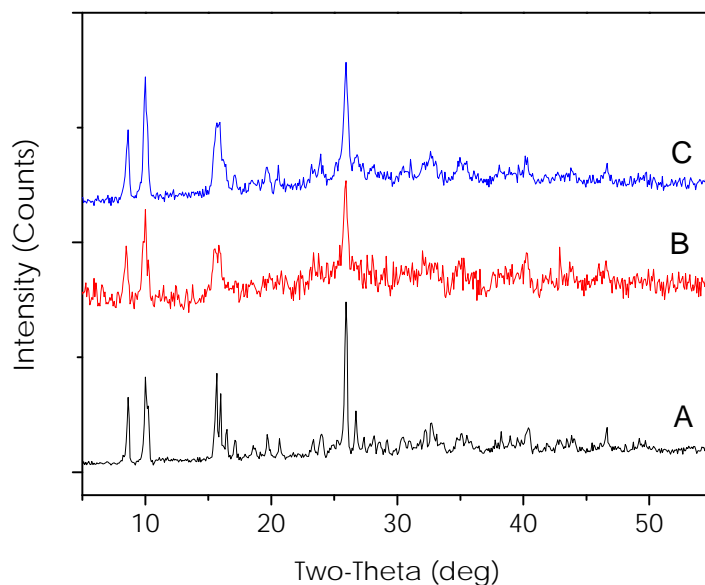

**Fig. S7.** PXRD patterns of **1**: A) before catalytic reactions; B) after catalytic reaction at 200 °C for 20 hr and re-exposure to air for a long period of time. Sample was rehydrated by adsorbing water from air; and C) after catalytic reaction at 175 °C for 20 hr and re-exposure to air for a long period of time.
